# Supplementary material
Source: PubMed Central journal article supplement (PMC7713713)
Supplement: NIHMS1648673-supplement-Supplementary_Material.pdf [file NIHMS1648673-supplement-Supplementary_Material.pdf]

# Supplemental Materials for Channel Embedding for Informative Protein Identification from Highly Multiplexed Images

## 1 Calculation of Ground Truth Importance

We define a ground truth importance of a target  $i$  as

$$g_i = \frac{1}{\mu_i^1} (|\mu_i^1 - \mu_i^2| + |\mu_i^2 - \mu_i^3| + |\mu_i^3 - \mu_i^1|), \quad (1)$$

where  $\mu_i^t$  is the average intensity of target  $i$  across all single cells of a tumor grade  $t$ .

## 2 More Quantitative Results on the Synthetic Dataset

We report the Recall@ $K$  for different values of  $K$  *i.e.*, different number of target proposals from an informative channel identification method. Table 1 compares informative channel identification methods in terms of Recall@ $K$ . It is observable that our method outperforms the other approaches for all values of  $K$ .

Table 1: Quantitative comparison on the synthetic dataset.

| Method           | Recall@ $K$ |             |              |              |              |              |              |              |
|------------------|-------------|-------------|--------------|--------------|--------------|--------------|--------------|--------------|
|                  | $K=6$       | $K=7$       | $K=8$        | $K=9$        | $K=10$       | $K=11$       | $K=12$       | $K=13$       |
| ResNet50 [4]     | 50.0        | 50.0        | 66.7         | 66.7         | 66.7         | 66.7         | 66.7         | 83.3         |
| ResNet3D-18 [20] | 50.0        | 50.0        | 50.0         | 50.0         | 50.0         | 50.0         | 50.0         | 50.0         |
| BSN [10]         | 0.0         | 0.0         | 0.0          | 0.0          | 0.0          | 0.0          | 0.0          | 0.0          |
| Ours             | <b>83.3</b> | <b>83.3</b> | <b>100.0</b> | <b>100.0</b> | <b>100.0</b> | <b>100.0</b> | <b>100.0</b> | <b>100.0</b> |

## 3 Target Importance for Tumor Grade Classification

Fig. 1 shows the measured target importance for tumor grade classification on the breast cancer dataset [5]. While the conventional methods [4, 10, 20] combined with interpretation techniques [15, 18] detect only up to five targets among the top-10, seven targets identified by our pipeline overlap with the top-10 single cell derived ground-truth.

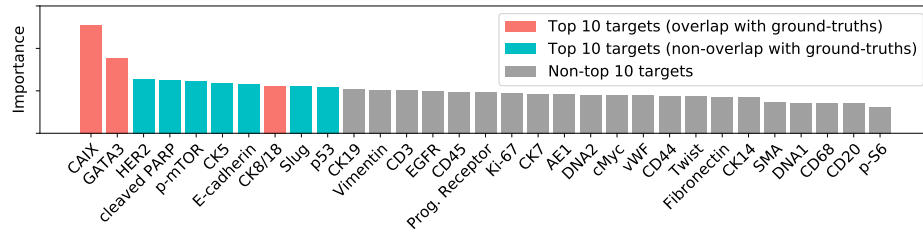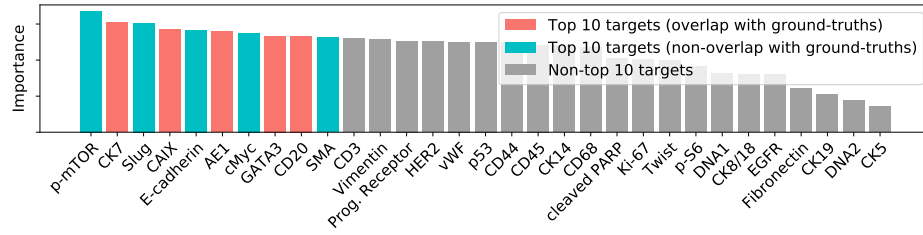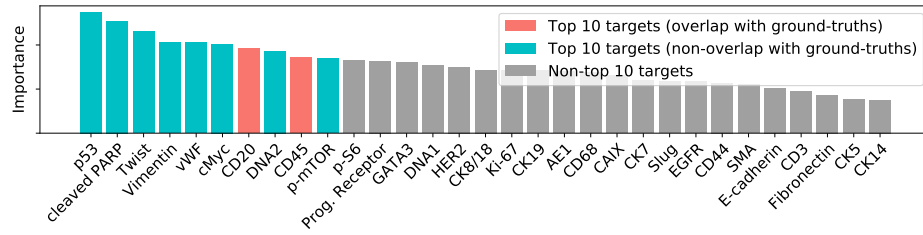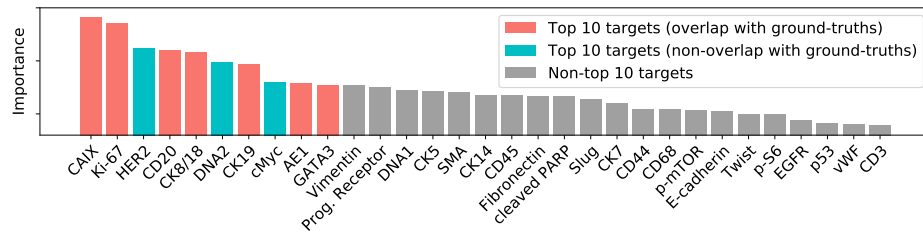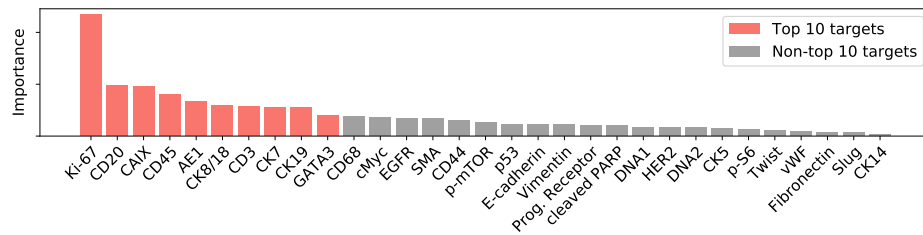

Fig. 1: Measured target importance for tumor grade classification on the breast cancer dataset [5], ordered by importance. We highlight the top 10 targets.

## 4 More Quantitative Results for Tumor Grade Classification

To fairly reflect the quality of our method, we report the Spearman correlation among the top- $K$  channels for varying values of  $K$ . In practice, clinicians prioritize the accuracy among the top- $K$  important channels. As shown in Table 2, for all values of  $K$ , our model outperforms baseline methods.

Table 2: Quantitative comparison for tumor grade classification.

| Method           | Spearman Coeff. among top- $K$ |             |             |             |             |
|------------------|--------------------------------|-------------|-------------|-------------|-------------|
|                  | $K=10$                         | $K=15$      | $K=20$      | $K=25$      | $K=30$      |
| ResNet50 [4]     | -37.0                          | 23.6        | -13.5       | -15.6       | 9.7         |
| ResNet3D-18 [20] | -1.8                           | 12.9        | -6.8        | 29.7        | 27.3        |
| BSN [10]         | 26.1                           | 41.4        | -6.8        | -12.5       | -10.0       |
| Ours             | <b>62.4</b>                    | <b>61.1</b> | <b>56.1</b> | <b>24.2</b> | <b>38.7</b> |
